# Supplementary material for: Use of a pathway quality improvement care bundle to reduce mortality after emergency laparotomy
Source: PubMed Central journal article supplement — Br J Surg. 2014 Nov 10;102(1):57–66. doi: 10.1002/bjs.9658 (PMC4312892; doi:10.1002/bjs.9658), 2014-11-10
Supplement: bjs0102-0057-sd7.pdf [file bjs0102-0057-sd7.pdf]

**Table 4** Process measures before and after implementation of the emergency laparotomy pathway quality improvement care bundle

|                                             | Site 1              |                      | Site 2               |                      | Site 3              |                     | Site 4              |                     |
|---------------------------------------------|---------------------|----------------------|----------------------|----------------------|---------------------|---------------------|---------------------|---------------------|
|                                             | Before              | After                | Before               | After                | Before              | After               | Before              | After               |
|                                             | ELPQuiC<br>(n = 51) | ELPQuiC<br>(n = 109) | ELPQuiC<br>(n = 144) | ELPQuiC<br>(n = 144) | ELPQuiC<br>(n = 44) | ELPQuiC<br>(n = 97) | ELPQuiC<br>(n = 60) | ELPQuiC<br>(n = 77) |
| <b>Early warning score recorded</b>         |                     |                      |                      |                      |                     |                     |                     |                     |
| No                                          | 22 (43)             | 38 (34.9)            | 0 (0)                | 32 (22.2)            | 8 (18)              | 1 (1)               | 0 (0)               | 1 (1)               |
| Yes                                         | 15 (29)             | 71 (65.1)            | 0 (0)                | 112 (77.8)           | 35 (80)             | 96 (99)             | 40 (67)             | 76 (99)             |
| n.a.                                        | 14 (27)             | –                    | 144 (100)            | –                    | 1 (2)               | –                   | 20 (33)             | –                   |
| <i>P</i> *                                  | < 0.001 (0.012)     |                      | Not computed         |                      | < 0.001 (< 0.001)   |                     | < 0.001 (1.000)     |                     |
| <b>Preop. antibiotics</b>                   |                     |                      |                      |                      |                     |                     |                     |                     |
| No                                          | 22 (43)             | 50 (45.9)            | 39 (27.1)            | 44 (30.6)            | 11 (25)             | 34 (35)             | 19 (32)             | 11 (14)             |
| Yes                                         | 25 (49)             | 58 (53.2)            | 69 (47.9)            | 100 (69.4)           | 33 (75)             | 63 (65)             | 18 (30)             | 66 (86)             |
| n.a.                                        | 4 (8)               | 1 (0.9)              | 36 (25.0)            | –                    | –                   | –                   | 23 (38)             | –                   |
| <i>P</i> *                                  | 0.082 (1.000)       |                      | < 0.001 (0.417)      |                      | 0.251               |                     | < 0.001 (< 0.001)   |                     |
| <b>Decision to theatre time &lt; 6 h</b>    |                     |                      |                      |                      |                     |                     |                     |                     |
| No                                          | 18 (35)             | 19 (17.4)            | 50 (34.7)            | 46 (31.9)            | 12 (27)             | 23 (24)             | 12 (20)             | 18 (23)             |
| Yes                                         | 25 (49)             | 86 (78.9)            | 64 (44.4)            | 92 (63.9)            | 22 (50)             | 67 (69)             | 21 (35)             | 59 (77)             |
| n.a.                                        | 8 (16)              | 4 (3.7)              | 30 (20.8)            | 6 (4.2)              | 10 (23)             | 7 (7)               | 27 (45)             | –                   |
| <i>P</i> *                                  | < 0.001 (0.004)     |                      | < 0.001 (0.092)      |                      | 0.020 (0.371)       |                     | < 0.001 (0.170)     |                     |
| <b>Intraop. goal-directed fluid therapy</b> |                     |                      |                      |                      |                     |                     |                     |                     |
| No                                          | 17 (33)             | 8 (7.3)              | 118 (81.9)           | 61 (42.4)            | 31 (70)             | 17 (18)             | 56 (93)             | 39 (51)             |
| Yes                                         | 32 (63)             | 100 (91.7)           | 26 (18.1)            | 83 (57.6)            | 13 (30)             | 80 (82)             | 4 (7)               | 38 (49)             |
| n.a.                                        | 2 (4)               | 1 (0.9)              | –                    | –                    | –                   | –                   | –                   | –                   |
| <i>P</i> *                                  | < 0.001 (< 0.001)   |                      | < 0.001              |                      | < 0.001             |                     | < 0.001             |                     |
| <b>Postop. intensive care</b>               |                     |                      |                      |                      |                     |                     |                     |                     |
| No                                          | 15 (29)             | 5 (4.6)              | 66 (45.8)            | 64 (44.4)            | 23 (52)             | 24 (25)             | 34 (57)             | 29 (38)             |
| Yes                                         | 36 (71)             | 104 (95.4)           | 76 (52.8)            | 80 (55.6)            | 21 (48)             | 73 (75)             | 26 (43)             | 48 (62)             |
| n.a.                                        | –                   | –                    | 2 (1.4)              | –                    | –                   | –                   | –                   | –                   |
| <i>P</i> *                                  | < 0.001             |                      | 0.501 (0.812)        |                      | 0.002               |                     | 0.038               |                     |
| <b>Consultant anaesthetist in theatre</b>   |                     |                      |                      |                      |                     |                     |                     |                     |
| No                                          | 31 (61)             | 19 (17.4)            | 66 (45.8)            | 51 (35.4)            | 4 (9)               | 2 (2)               | 29 (48)             | 27 (35)             |
| Yes                                         | 20 (39)             | 90 (82.6)            | 78 (54.2)            | 93 (64.6)            | 40 (91)             | 95 (98)             | 31 (52)             | 50 (65)             |
| n.a.                                        | –                   | –                    | –                    | –                    | –                   | –                   | –                   | –                   |
| <i>P</i> *                                  | < 0.001             |                      | 0.093                |                      | 0.076               |                     | 0.161               |                     |
| <b>Consultant surgeon in theatre</b>        |                     |                      |                      |                      |                     |                     |                     |                     |
| No                                          | 28 (55)             | 18 (16.5)            | 85 (59.0)            | 68 (47.2)            | 8 (18)              | 14 (14)             | 15 (25)             | 16 (21)             |
| Yes                                         | 23 (45)             | 91 (83.5)            | 59 (41.0)            | 76 (52.8)            | 36 (82)             | 83 (86)             | 45 (75)             | 61 (79)             |
| n.a.                                        | –                   | –                    | –                    | –                    | –                   | –                   | –                   | –                   |
| <i>P</i> *                                  | < 0.001             |                      | 0.059                |                      | 0.619               |                     | 0.681               |                     |

Values in parentheses are percentages unless indicated otherwise. ELPQuiC, emergency laparotomy pathway quality improvement care; n.a., not available. \*Fisher's two-tailed exact test with yes, no and n.a. as distinct categories; *P* values in parentheses were calculated excluding n.a.

mean P-POSSUM risk of death, individually for each hospital and collectively for all hospitals using a test for proportions.

The statistical significance of changes in process-of-care variables was determined using a two-tailed Fisher's exact

test with missing data treated as a separate category, and also with the missing data excluded from the calculations, so that the extent to which missing data contributed to the change could be assessed. All analyses were undertaken
